# Supplementary material for: Application of novel nanocomposite-modified electrodes for identifying rice wines of different brands
Source: Royal Society of Chemistry journal article supplement (doi:10.1039/c8ra00164b), 2018-01-01
Supplement: c8ra00164b1.pdf [file c8ra00164b1.pdf]

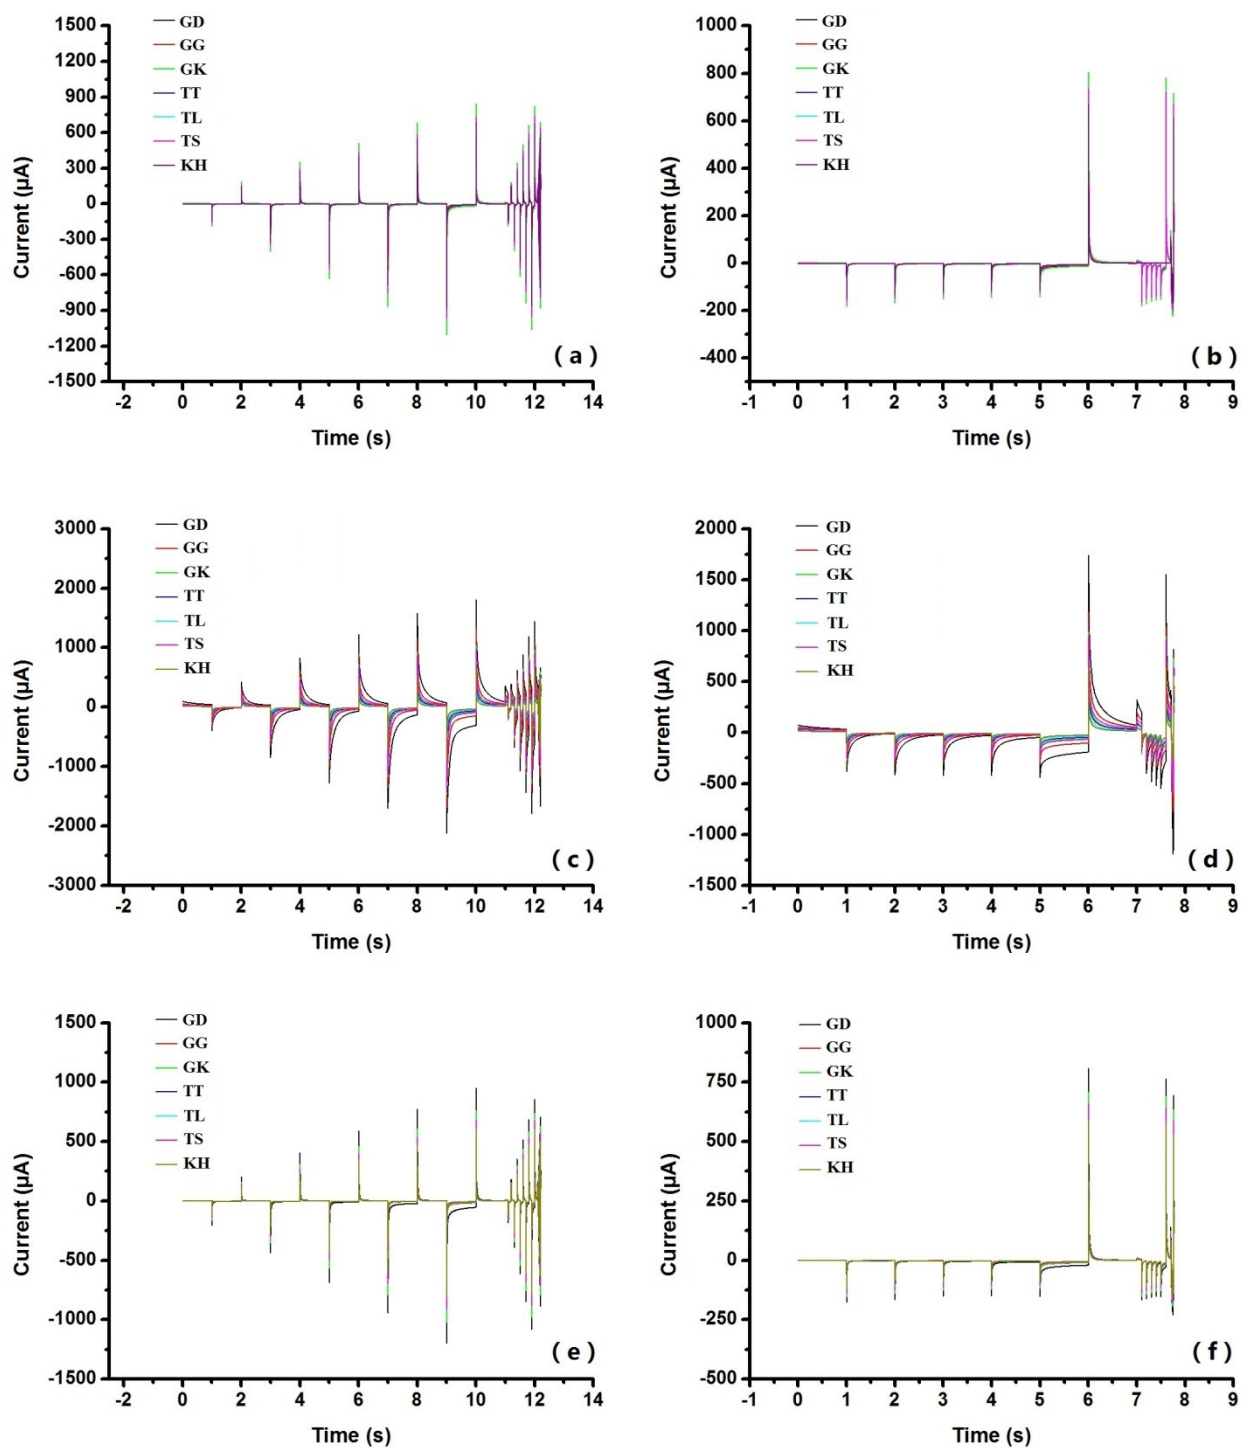

1

2

**Fig. S1 The response current curves of modified electrodes array to 7 brands of rice wines.**

3 **The responses obtained by PACBK/AuNPs/GCE based on the MRPV (a) and MSPV (b), the responses**

4 **obtained by PABSA/AuNPs/GCE based on MSPV (c) and MSPV (d), the responses obtained by**

5 **PGA/CuNPs/GCE based on MSPV (e) and MSPV (f).**

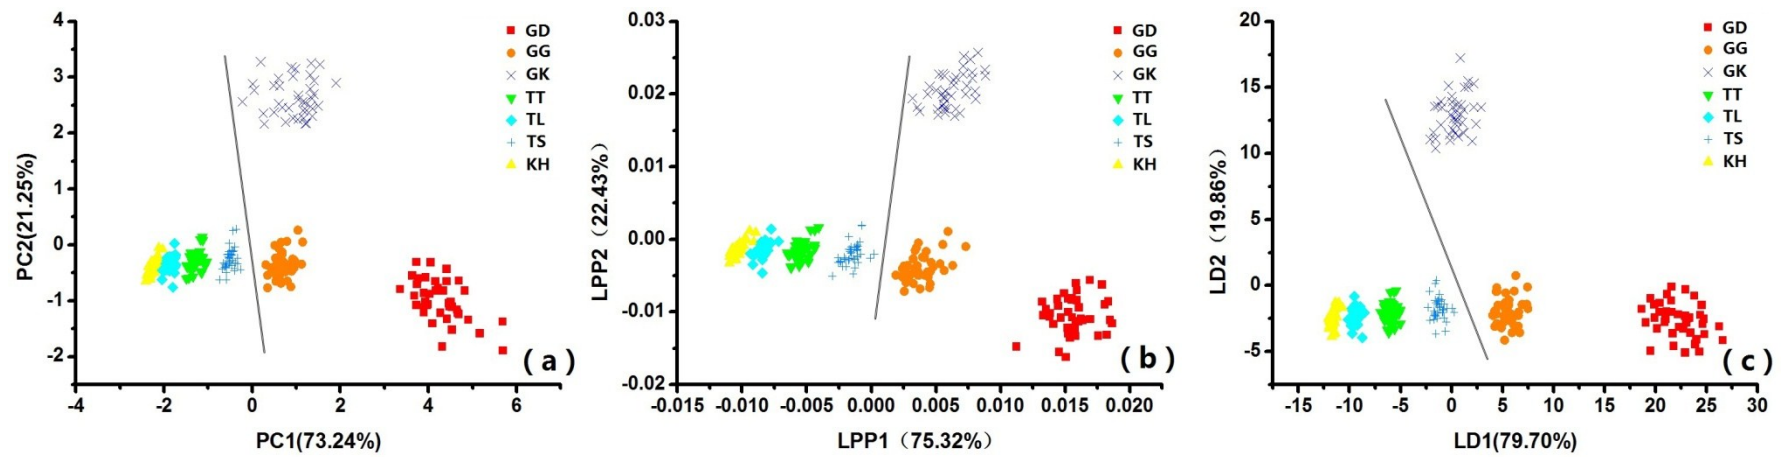

Fig. S2 Discrimination results of (a) PCA, (b) LPP and (c) LDA based on area feature data.

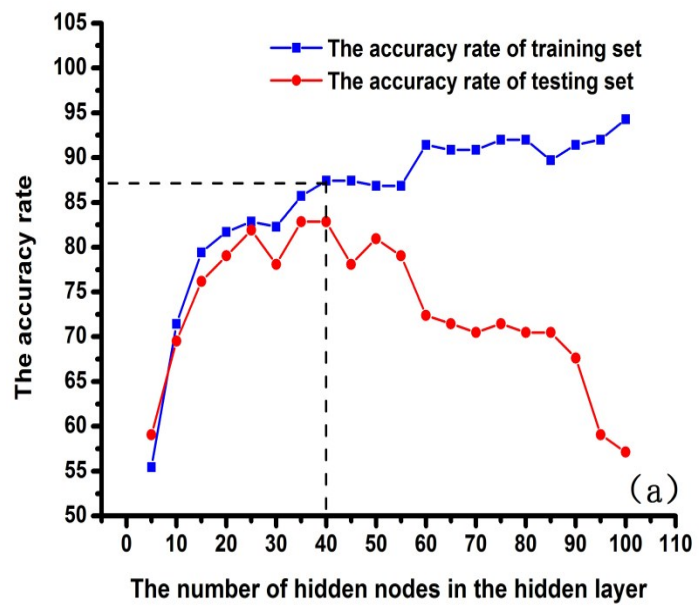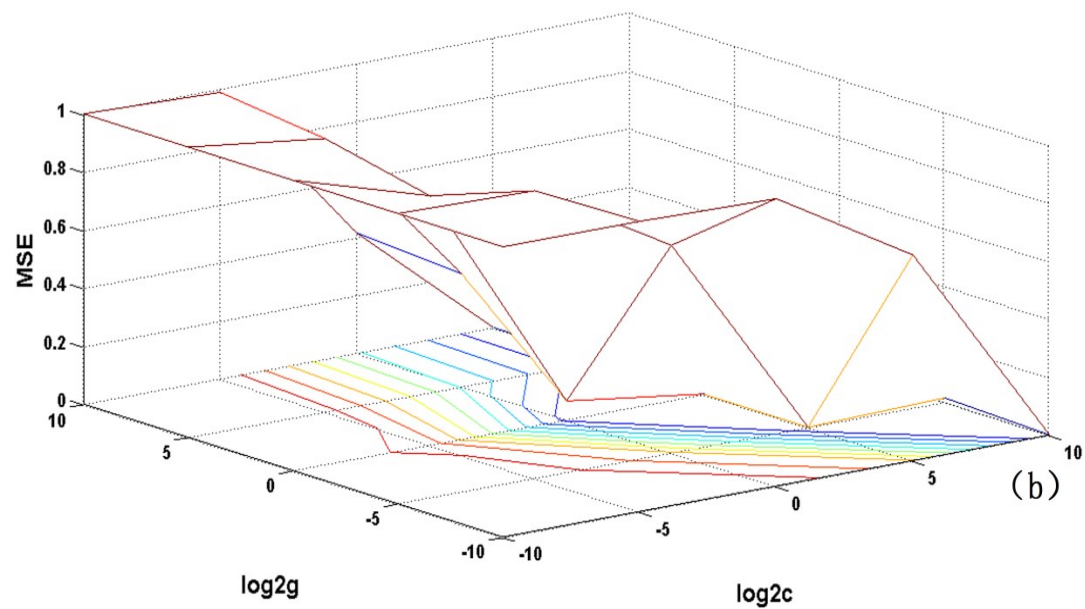

Fig. S3 The variation trend of the accuracy rate of ELM model (a) and the 3D view of parameter selections of LIBSVM (b).
